# Supplementary material for: Major depressive disorder and suicide risk among adult outpatients at several general hospitals in a Chinese Han population
Source: PubMed Central journal article supplement (PMC5634639; doi:10.1371/journal.pone.0186143), 2017-10-10
Supplement: pone.0186143.s010.pdf [file pone.0186143.s010.pdf]

# 广州市惠爱医院伦理委员会

## 审 批 件

(2016) 第 (021) 号

|          |                                                                                                                                                                                                                                                                                                                                                                                                                                                   |                          |                          |                          |                          |                          |
|----------|---------------------------------------------------------------------------------------------------------------------------------------------------------------------------------------------------------------------------------------------------------------------------------------------------------------------------------------------------------------------------------------------------------------------------------------------------|--------------------------|--------------------------|--------------------------|--------------------------|--------------------------|
| 研究项目名称   | 广州市综合医院抑郁焦虑障碍患者早期筛查和全程干预模式的研究                                                                                                                                                                                                                                                                                                                                                                                                                     |                          |                          |                          |                          |                          |
| 申办单位     | 广州市惠爱医院                                                                                                                                                                                                                                                                                                                                                                                                                                           |                          |                          |                          |                          |                          |
| 主要研究者及地址 | 宁玉萍 广州市荔湾区明心路 36 号, 邮编: 510370                                                                                                                                                                                                                                                                                                                                                                                                                    |                          |                          |                          |                          |                          |
| 审阅及批准的文件 | 1、研究方案<br>2、知情同意书                                                                                                                                                                                                                                                                                                                                                                                                                                 |                          |                          |                          |                          |                          |
| 表决意见     | 同意                                                                                                                                                                                                                                                                                                                                                                                                                                                | 修改后同意                    | 不同意                      | 终止或暂停                    | 弃权                       | 请假                       |
|          | <input checked="" type="checkbox"/>                                                                                                                                                                                                                                                                                                                                                                                                               | <input type="checkbox"/> | <input type="checkbox"/> | <input type="checkbox"/> | <input type="checkbox"/> | <input type="checkbox"/> |
| 审批结论     | <p>1. 委员会对该方案的审查决定如下(在口内划×)</p> <p><input checked="" type="checkbox"/>同意</p> <p><input type="checkbox"/>修改后同意</p> <p><input type="checkbox"/>不同意</p> <p><input type="checkbox"/>终止或暂停试验</p> <p>2. 该研究进行过程中将接受伦理委员会的持续审查? <input type="checkbox"/>是 <input checked="" type="checkbox"/>否</p> <p>审查频率: <input type="checkbox"/>3 个月 <input type="checkbox"/>6 个月 <input type="checkbox"/>12 个月</p> <p>主任委员: [Signature]</p> <p>签名日期: 2016.12.29</p> |                          |                          |                          |                          |                          |
| 附件       | 委员名单                                                                                                                                                                                                                                                                                                                                                                                                                                              |                          |                          |                          |                          |                          |
| 声明       | <p>本伦理委员会的职责、人员组成、操作程序及记录遵循 ICH-GCP、中国的相关法律法规。<br/>This ethics committee's responsibilities, composition, function, operations and records are fully compliant with ICH-GCP, and related regulation and law of China.<br/>本批件自签字日期起一年内有效, 过期请重新提交申请。</p>                                                                                                                                                                                          |                          |                          |                          |                          |                          |

(广州市惠爱医院伦理委员会地址: 广州市荔湾区明心路 36 号)
